# Supplementary material for: Distinct regulation of hippocampal neuroplasticity and ciliary genes by corticosteroid receptors
Source: PubMed Central journal article supplement (PMC8346558; doi:10.1038/s41467-021-24967-z), 2021-08-06
Supplement: 41467_2021_24967_MOESM2_ESM.pdf [file 41467_2021_24967_MOESM2_ESM.pdf]

## Description of Additional Supplementary Files

File Name: Supplementary Data 1

Description: MR peaks in each sample

File Name: Supplementary Data 2

Description: GR peaks in each sample

File Name: Supplementary Data 3

Description: MR-only MR-GR GR-only peaks

File Name: Supplementary Data 4

Description: MR GR DiffBind Analysis

File Name: Supplementary Data 5

Description: FIMO Analysis

File Name: Supplementary Data 6

Description: RNA-Seq - Intronic Read Counts

File Name: Supplementary Data 7

Description: RNA-Seq - Exonic Read Counts

File Name: Supplementary Data 8

Description: DE Analysis - Intronic Counts

File Name: Supplementary Data 9

Description: DE Analysis - Exonic Counts

File Name: Supplementary Data 10

Description: MR GR vs Intronic Exonic

File Name: Supplementary Data 11

Description: GO Pathway Analysis

File Name: Supplementary Data 12

Description: IPA Analysis
